# Supplementary material for: The effects of time‐restricted eating and weight loss on bone metabolism and health: a 6‐month randomized controlled trial
Source: PubMed Central journal article supplement — Obesity (Silver Spring). 2022 Oct 14;31(Suppl 1):85–95. doi: 10.1002/oby.23577 (PMC10092311; doi:10.1002/oby.23577), 2022-10-14
Supplement: OBY-31-85-s001.pdf [file OBY-31-85-s001.pdf]

# The effects of time-restricted eating and weight loss on bone metabolism and health: a 6-month randomized controlled trial

Maria Papageorgiou <sup>1</sup>, Emmanuel Biver <sup>1</sup>, Julie Mareschal <sup>2</sup>, Nicholas Edward Phillips <sup>2,3</sup>, Alexandra Hemmer <sup>2</sup>, Emma Biolley <sup>2</sup>, Nathalie Schwab <sup>4,5</sup>, Emily N. C. Manoogian <sup>6</sup>, Elena Gonzalez Rodriguez <sup>7</sup>, Daniel Aeberli <sup>8</sup>, Didier Hans <sup>7</sup>, Caroline Pot <sup>9</sup>, Satchidananda Panda <sup>6</sup>, Nicolas Rodondi <sup>4,5</sup>, Serge Ferrari <sup>1</sup>, Tinh-Hai Collet <sup>2,10</sup>

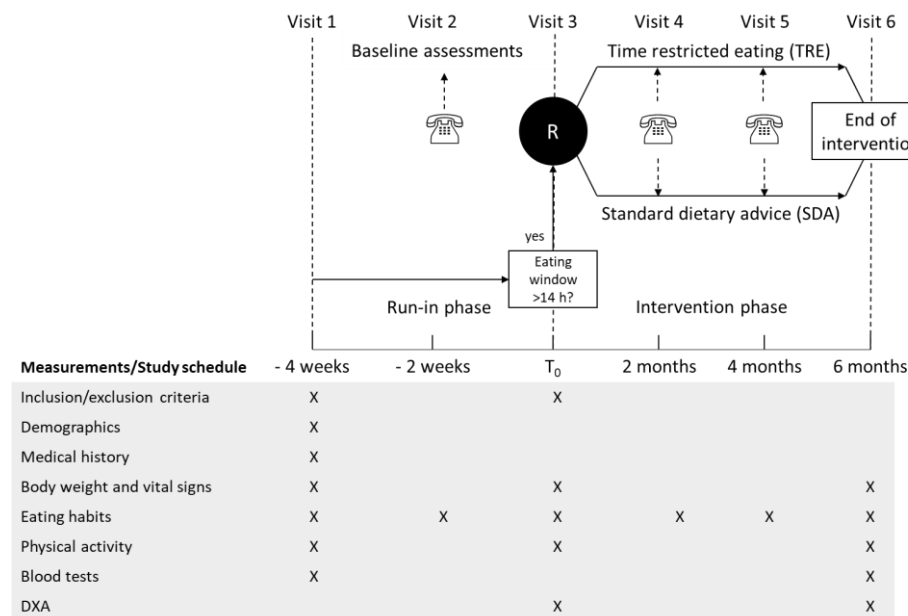

**Figure S1:** Study and measurement schedule

Abbreviations: DXA: dual energy X-ray absorptiometry (for assessing body composition and total body bone mineral content/density), SDA: standard dietary advice, TRE: time-restricted eating.

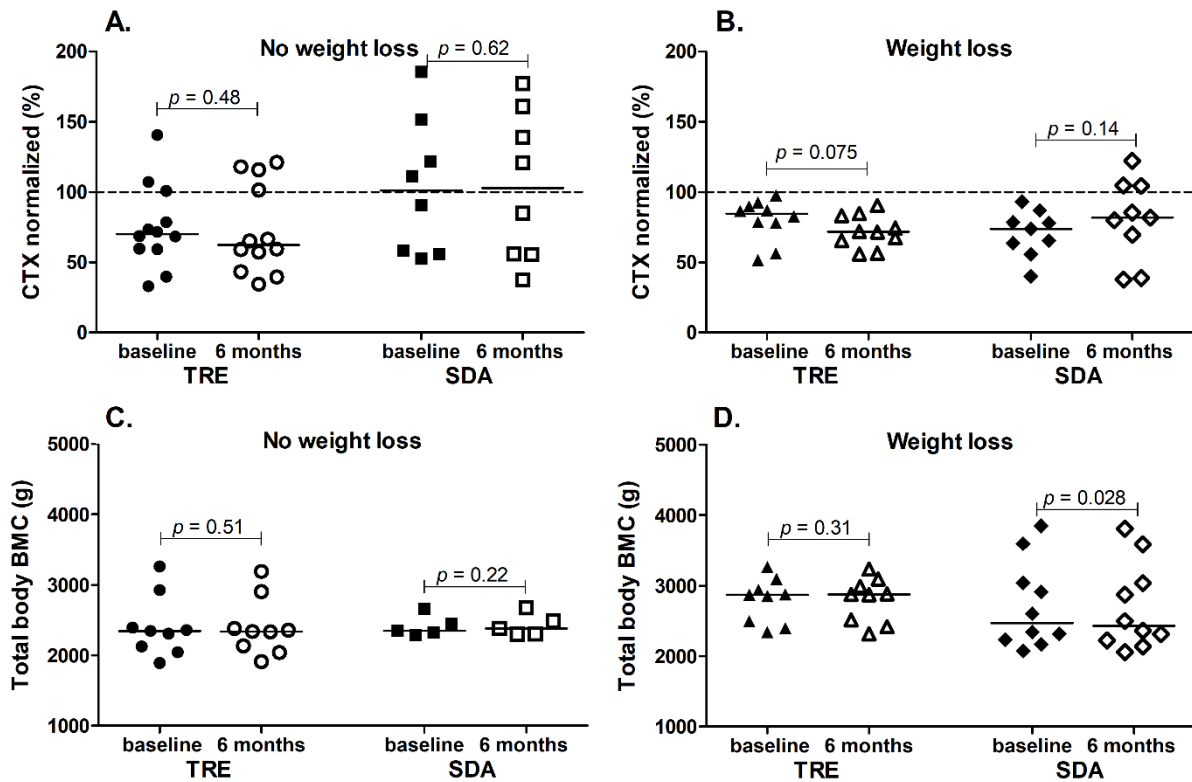

**Figure S2:** CTX normalized levels and total body BMC at baseline and 6-month follow-up in weight loss responders and non-responders by intervention group (TRE vs. SDA).

Individual data are presented and solid black lines signify the median in each group. TRE weight loss non-responders (baseline; black circles; follow-up: white circles), SDA weight loss non-responders (baseline; black squares; follow-up: white squares), TRE weight loss responders (baseline; black triangles; follow-up: white triangles), SDA weight loss responders (baseline; black rhombus; follow-up: white rhombus). Normalized CTX levels were calculated by dividing the absolute value for CTX by the upper cut-off for defining reference levels for age, sex and menopausal status provided by our local laboratory.

Abbreviations: BMC: bone mineral content, BMD: bone mineral density, DXA: dual-energy X-ray absorptiometry, P1NP: procollagen type 1 N-terminal propeptide  $\beta$ -CTX:  $\beta$ -carboxyterminal cross-linked telopeptide of type I collagen, SDA: standard dietary advice, TRE: time-restricted eating

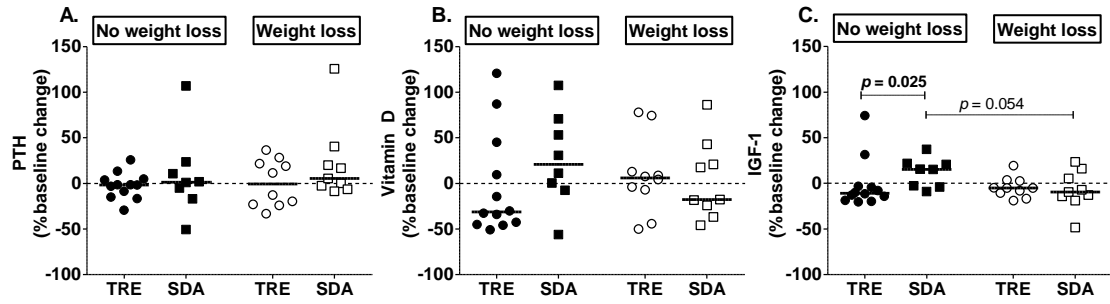

**Figure S3.** Changes in bone-related hormones in weight loss responders and non-responders by intervention group.

Individual percent change in PTH (Panel A), vitamin D (Panel B), and IGF-I (Panel C) from baseline, where the solid black lines represent the median in each group: TRE weight loss non-responders (black circles), SDA weight loss non-responders (black squares), TRE weight loss responders (white circles), SDA weight loss responders (white squares). Only significant  $p$ -values ( $\leq 0.05$ ) are indicated for legibility. Abbreviations: IGF-I, insulin-like growth factor-1 levels, PTH: parathormone, SDA: standard dietary advice, TRE: time restricted eating
